# Supplementary material for: Investigating the role and applicability of patient versions of guidelines in oncology and deriving recommendations for the development, dissemination and implementation of patient versions in Germany: protocol for multiphase study
Source: HighWire-hosted journal article supplement (doi:10.1136/bmjopen-2021-059040), 2022-03-01
Supplement: bmjopen-2021-059040supp002_data_supplement.pdf [file bmjopen-2021-059040supp002_data_supplement.pdf]

**Appendix B: Search Strategies for PubMed and OVID (Medline)**

|                   |                                                                                                                                                                                                                                                                                                                                                                                                                                                                                                                                                                                                                                                                                                                                                      |
|-------------------|------------------------------------------------------------------------------------------------------------------------------------------------------------------------------------------------------------------------------------------------------------------------------------------------------------------------------------------------------------------------------------------------------------------------------------------------------------------------------------------------------------------------------------------------------------------------------------------------------------------------------------------------------------------------------------------------------------------------------------------------------|
| PubMed            | <p>((("Practice Guidelines as Topic"[Mesh] or guideline*[tiab]) AND (patient version*[tiab] OR public version*[tiab])) OR patient guideline*[tiab] OR "evidence-based patient information*" [tiab]) AND (method[tiab] OR methods[tiab] OR methodolog*[tiab] OR ((methodical[tiab] OR methodological[tiab]) AND (approach[tiab] OR procedure[tiab]))) OR proceeding[tiab] OR procedure[tiab] OR creation[tiab] OR developing[tiab] OR development[tiab] OR elaboration[tiab] OR preparation[tiab] OR conducting[tiab] OR implementation[tiab] OR disseminat*[tiab]) AND (english[la] OR german[la]) NOT (comment[pt] OR letter[pt] OR editorial[pt])</p>                                                                                              |
| OVID<br>(Medline) | <ol style="list-style-type: none"> <li>1. exp practice guideline/</li> <li>2. guideline?.ti,ab,kf.</li> <li>3. ((patient or public) adj1 version?).ti,ab,kf.</li> <li>4. (1 or 2) and 3</li> <li>5. (patient? adj2 guideline?).ti,ab,kf.</li> <li>6. evidence-based patient information.ti,ab,kf.</li> <li>7. 4 or 5 or 6</li> <li>8. (method? or methodolog* or ((methodical or methodological) adj1 (approach or procedure)) or proceeding or procedure or creation or developing or development or elaboration or preparation or conducting or implementation or disseminat*).ti,ab,kf.</li> <li>9. 7 and 8</li> <li>10. (english or german).la.</li> <li>11. 9 and 10</li> <li>12. (comment or letter or editorial).pt. 13. 11 not 12</li> </ol> |
